# Supplementary material for: Identification, and Experimental and Bioinformatics Validation of an Immune-Related Prognosis Gene Signature for Low-Grade Glioma Based on mRNAsi
Source: MDPI journal article supplement (doi:10.3390/cancers15123238), 2023-06-19
Supplement: s1 [file s1]

Supplementary Table S1

|         | Forward (5'-3' sequence) | Reverse (5'-3' sequence) |
|---------|--------------------------|--------------------------|
| SLC11A1 | CAAAGGCTAAGCGGGTCCAG     | AGCAGCACCCAGAGAAGTTTG    |
| C3AR1   | GCAGGTTCCCTATGCAAGCTC    | CACATCACAAAAGCCACCAC     |
| IL18    | ATCGCTTCCTCTCGCAACAA     | GTCCGGGGTGCATTATCTCT     |
| MSR1    | CAGTGCTGCTTTCTTTAGGACG   | ACTTCAGGAGTTGAGCTGCC     |
